# Supplementary material for: Characterization of the public transit air microbiome and resistome reveals geographical specificity
Source: PubMed Central journal article supplement (PMC8157753; doi:10.1186/s40168-021-01044-7), 2021-05-26
Supplement: 40168_2021_1044_MOESM10_ESM.pdf [file 40168_2021_1044_MOESM10_ESM.pdf]

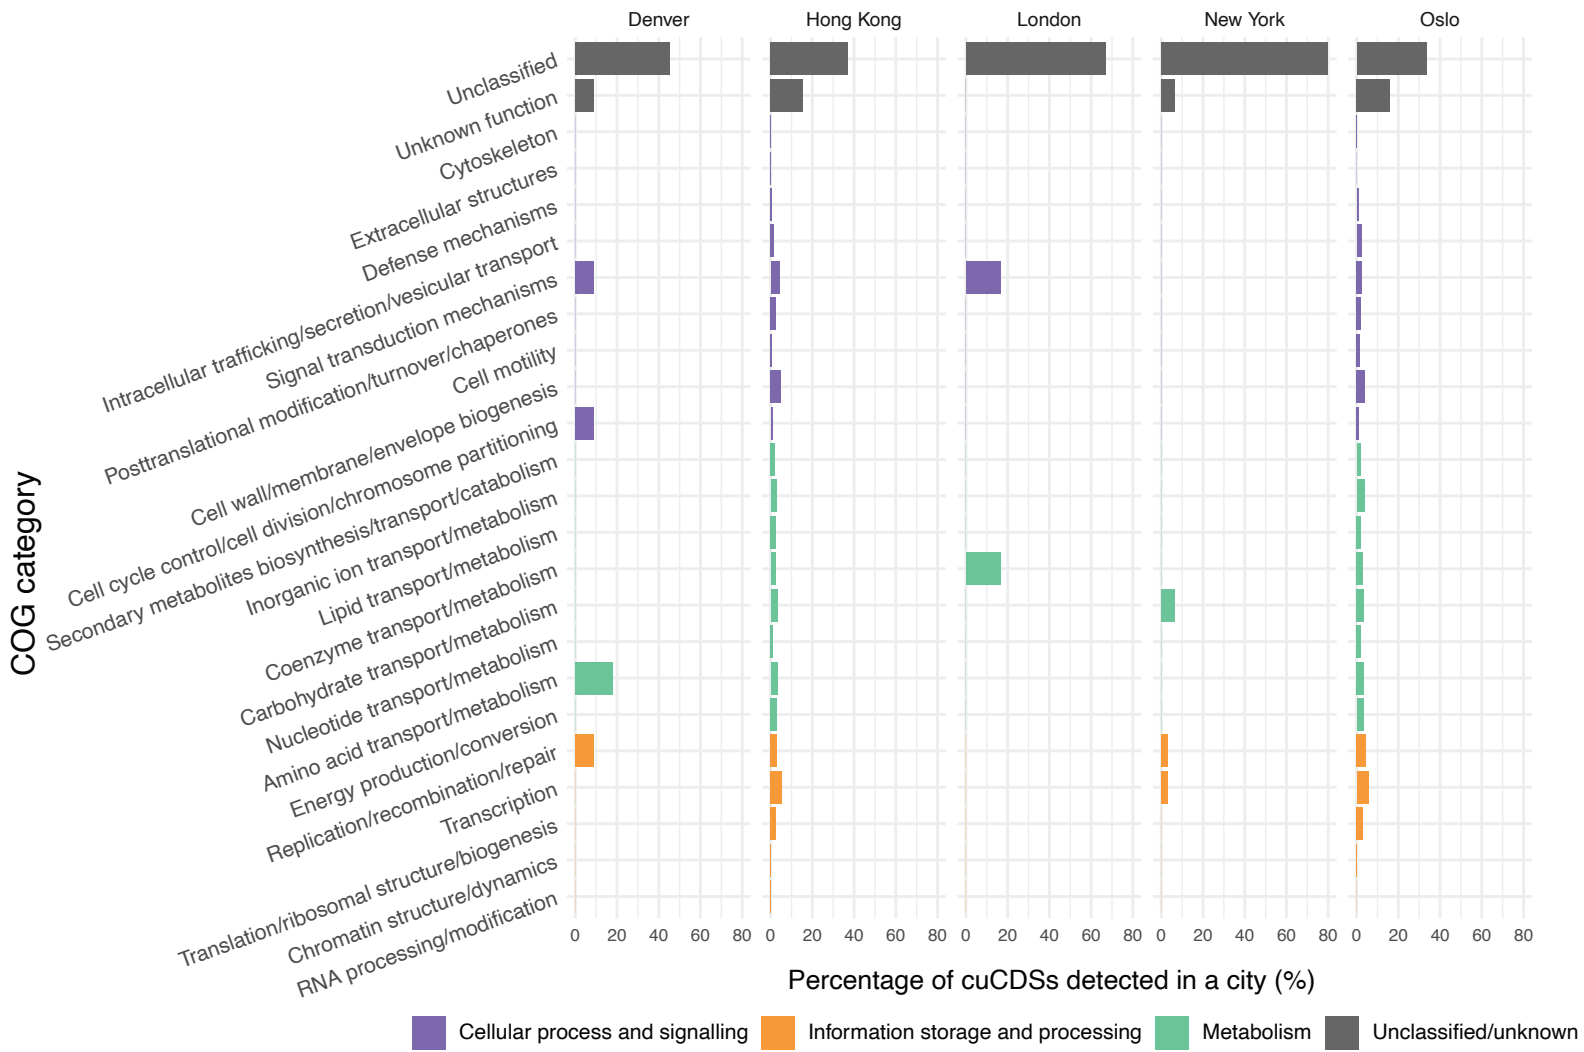

Additional File 10: Figure S5
